# Supplementary material for: Photoresponsive Gelation of Four-Armed Poly(ethylene glycol) with Photodimerizable Groups
Source: MDPI journal article supplement (doi:10.3390/gels8030183), 2022-03-16
Supplement: s1 [file s1]

## Supporting Information

### Photoresponsive Gelation of Four-Armed Poly(ethylene glycol) with Photodimerizable Groups

*Masaaki Okihara<sup>1</sup>, Kohei Okuma<sup>1</sup>, Akifumi Kawamura<sup>1, 2</sup> and Takashi Miyata<sup>1, 2, \*</sup>*

<sup>1</sup>Department of Chemistry and Materials Engineering, Kansai University, 3-3-35, Yamate-cho, Suita, Osaka 564-8680, Japan

<sup>2</sup>Organization for Research and Development of Innovative Science and Technology, Kansai University, 3-3-35, Yamate-cho, Suita, Osaka 564-8680, Japan

\*Correspondence: e-mail: [tmiyata@kansai-u.ac.jp](mailto:tmiyata@kansai-u.ac.jp)

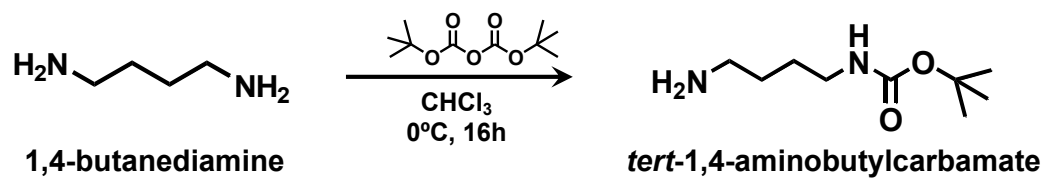

Scheme S1. Synthesis of *tert*-1,4-aminobutylcarbamate.

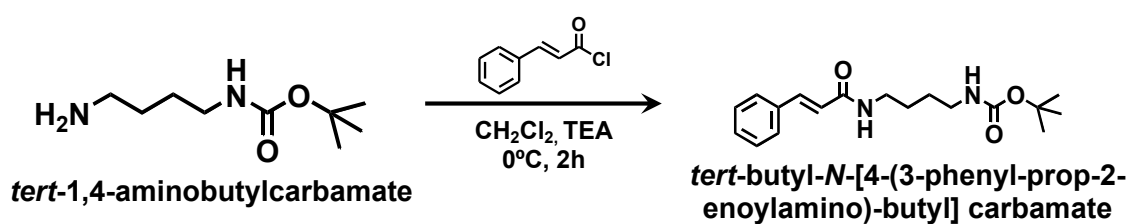

Scheme S2. Synthesis of *tert*-butyl-*N*-[4-(3-phenyl-prop-2-enoylamino)-butyl] carbamate.

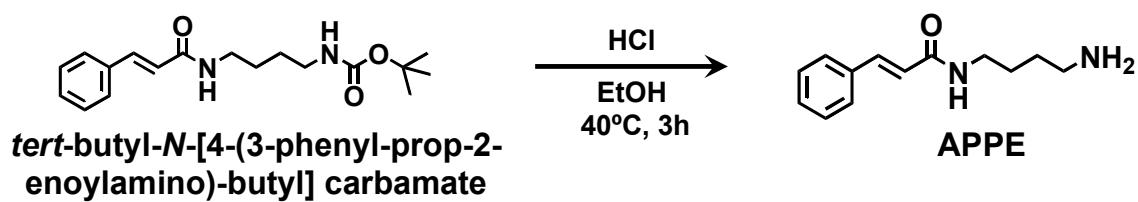

Scheme S3. Synthesis of *N*-(4-aminobutyl)-3-phenyl-prop-2-enamide (APPE).

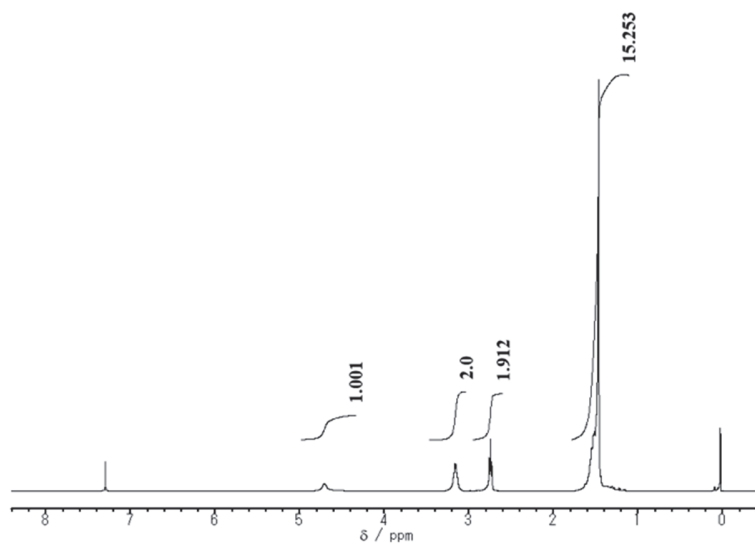

Figure S1.  $^1\text{H}$  NMR spectrum of *tert*-1,4-aminobutylcarbamate (400 MHz,  $\text{CDCl}_3$ , 32 times).

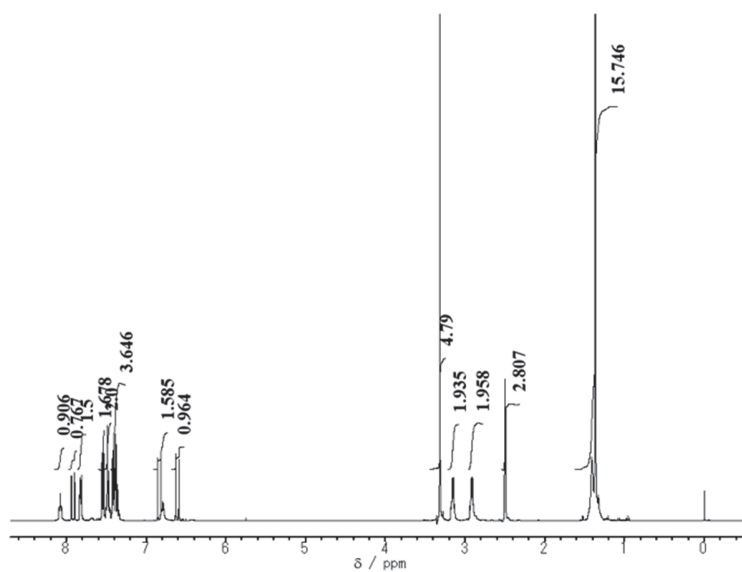

Figure S2.  $^1\text{H}$  NMR spectrum of *tert*-butyl-N-[4-(3-phenyl-prop-2-enoylamino)-butyl] carbamate (400 MHz,  $\text{CDCl}_3$ , 32 times).

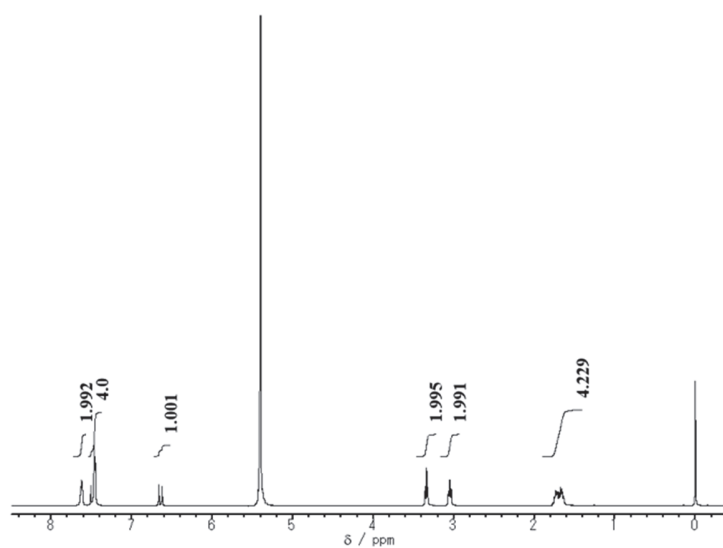

Figure S3.  $^1\text{H}$  NMR spectrum of *N*-(4-aminobutyl)-3-phenyl-prop-2-enamide (APPE) (400 MHz,  $\text{D}_2\text{O}$ , TMS, 32 times).

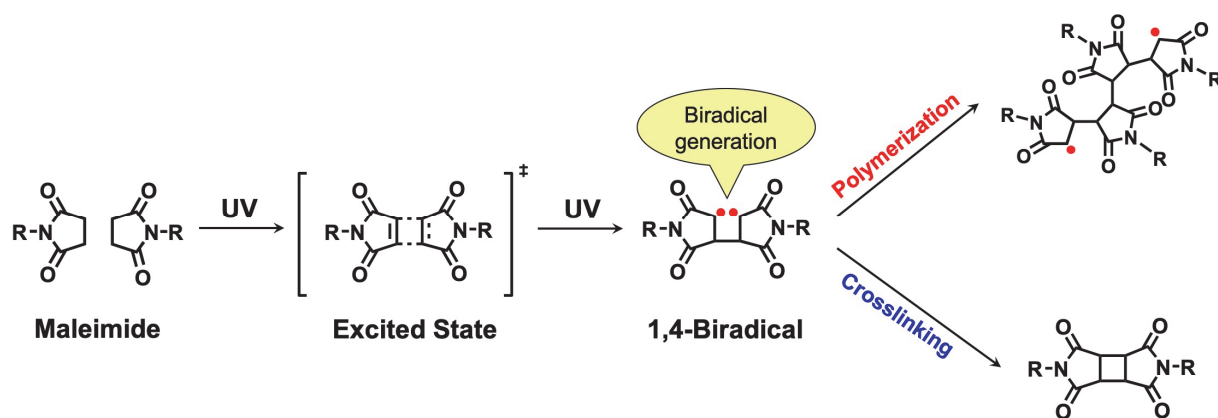

Figure S4. Reaction mechanism for the photodimerization of the maleimide groups of maleimide-tetra-PEG.
